# Supplementary material for: PERK eIF2 alpha kinase is required to regulate the viability of the exocrine pancreas in mice
Source: PubMed Central journal article supplement (PMC2072952; doi:10.1186/1471-2121-8-38), 2007-08-29
Supplement: 1471-2121-8-38-S1.pdf [file 1471-2121-8-38-S1.pdf]

| Gene symbol                | Gene title                                    | P16 <sup>a</sup> | P19 <sup>a</sup> | P32 <sup>a</sup> |
|----------------------------|-----------------------------------------------|------------------|------------------|------------------|
| <b>Stress/injury</b>       |                                               |                  |                  |                  |
| <i>Pap</i>                 | pancreatitis-associated protein               | 11.2             | 26.0             | ns               |
| <i>Pap</i>                 | pancreatitis-associated protein               | 7.2              | 13.0             | ns               |
| <i>Reg3g</i>               | regenerating islet-derived 3 gamma            | 7.6              | 18.4             | 3.2              |
| <i>Reg3a</i>               | regenerating islet-derived 3 alpha            | 3.2              | 11.3             | ns               |
| <i>Reg2</i>                | regenerating islet-derived 2                  | 4.1              | 5.3              | 0.5              |
| <i>Hspa1a / Hsp70-3</i>    | heat shock protein 1A                         | 10.5             | -                | -                |
| <i>Hspa1b / Hsp70-1</i>    | heat shock protein 1B                         | 12.6             | 2.8              | ns               |
| <i>Hspa1b / Hsp70-1</i>    | heat shock protein 1B                         | 8.5              | 2.6              | 2.3              |
| <i>Hspa1b / Hsp70-1</i>    | heat shock protein 1B                         | 6.5              | 2.5              | ns               |
| <i>Hsp105</i>              | heat shock protein 105                        | ns               | 7.5              | ns               |
| <i>1810009J06Rik</i>       | trypsinogen                                   | ns               | 4.3              | 3.2              |
| <i>Ctrc</i>                | chymotrypsin C (caldecrin)                    | 4.9              | ns               | 0.2              |
| <i>Cox7a1</i>              | cytochrome c oxidase, subunit VIIa 1          | -                | 2.6              | 5.3              |
| <i>Cp</i>                  | ceruloplasmin                                 | ns               | ns               | 4.9              |
| <b>Inflammation/immune</b> |                                               |                  |                  |                  |
| <i>Mac-2 / Lgals3</i>      | lectin, galactose binding, soluble 3          | ns               | 5.7              | 4.6              |
| <i>Mmp12</i>               | matrix metalloproteinase 12                   | -                | 14.9             | 55.7             |
| <i>Scya6 / Ccl6</i>        | chemokine (C-C motif) ligand 6                | 2.0              | 4.9              | 3.5              |
| <i>Lcn2</i>                | lipocalin 2                                   | 2.8              | ns               | 4.3              |
| <i>Lip1</i>                | lysosomal acid lipase 1                       | ns               | 4.9              | ns               |
| <i>Hexb</i>                | hexosaminidase B (lysosome)                   | ns               | 3.0              | 5.3              |
| <i>Serpine2</i>            | serine (or cysteine) proteinase inhibitor, E2 | ns               | 2.0              | 4.3              |
| <i>Socs3</i>               | suppressor of cytokine signaling 3            | ns               | ns               | 6.5              |
| <i>Ambp</i>                | alpha 1 microglobulin/bikunin                 | ns               | ns               | 4.3              |
| <i>Tlr3</i>                | toll-like receptor 3                          | ns               | 9.8              | -                |
| <i>Pld1</i>                | phospholipase D1                              | ns               | -                | 7.5              |
| <b>Matrix/cytoskeleton</b> |                                               |                  |                  |                  |
| <i>Bgn</i>                 | biglycan                                      | -                | 7.0              | 7.5              |
| <i>Vwf</i>                 | Von Willebrand factor homolog                 | -                | 12.1             | -                |
| <i>GpnmB</i>               | glycoprotein (transmembrane) nmb              | -                | -                | 7.0              |
| <i>Cldn2</i>               | claudin 2                                     | -                | -                | 4.6              |
| <i>Cnn3</i>                | calponin 3, acidic                            | 5.8              | 3.2              | ns               |
| <i>Tagln</i>               | transgelin                                    | -                | 4.3              | -                |
| <i>Pfn2</i>                | profilin 2                                    | ns               | ns               | 4.3              |
| <b>Growth-related</b>      |                                               |                  |                  |                  |
| <i>Tgfb1</i>               | transforming growth factor, beta induced      | 4.1              | -                | -                |
| <i>Acvrin1</i>             | activin receptor interacting protein 1        | 6.2              | -                | ns               |
| <i>Pdgfra</i>              | platelet derived growth factor receptor alpha | ns               | 4.9              | ns               |
| <b>Others</b>              |                                               |                  |                  |                  |
| <i>Galgt1</i>              | beta-1,4 N-acetylgalactosaminyltransferase    | -                | ns               | 11.3             |
| <i>Gif</i>                 | gastric intrinsic factor                      | -                | -                | 9.2              |
| <i>Ms4a7</i>               | membrane-spanning 4-domains, A7               | -                | -                | 8.6              |

|                      |                                                          |     |     |      |
|----------------------|----------------------------------------------------------|-----|-----|------|
| <i>Ms4a11</i>        | membrane-spanning 4-domains, A11                         | ns  | 8.0 | 2.0  |
| <i>Thoc4</i>         | THO complex 4                                            | ns  | 7.5 | ns   |
| <i>Trim30</i>        | tripartite motif protein 30                              | ns  | 4.0 | ns   |
| <i>Tm7sfl</i>        | transmembrane 7 superfamily member 1                     | ns  | 9.2 | 7.5  |
| <i>Tm7sfl</i>        | transmembrane 7 superfamily member 1                     | -   | ns  | 7.5  |
| <i>Tmem45a</i>       | transmembrane protein 45a                                | -   | ns  | 7.5  |
| <i>Tspan1</i>        | tetraspan 1                                              | -   | -   | 26.0 |
| <i>I700029I01Rik</i> | RIKEN cDNA 1700029I01 gene                               | ns  | ns  | 5.7  |
| <i>I110021E09Rik</i> | weakly similar to splicing factor, arginineserine-rich 4 | ns  | ns  | 6.1  |
| -                    | weakly similar to env polyprotein, retrovirus-related    | -   | ns  | 8.0  |
| -                    | expressed sequence AI594671                              | 5.7 | -   | -    |

**Table S1. Summary of microarray data for genes that showed increased expression levels in the mutant pancreata.** Fold change in the mutant expression levels as compared to the wild-type levels. “-”, the expression was not detectable at a significant level; “ns,” the expression was detectable but was less than 2-fold change between mutant and wild-type samples significant level (i.e., less than 2-fold change). Repeated appearance of the same gene in the tables indicates multiple detections by different Affymetrix probes for the same gene. For P16 samples, RNA from a single pancreas was used per array, and each genotype had two biological replicates. For data analysis, signals of the replicates were averaged for each probe within a genotype for calculation of a ratio (i.e., mutant average signal / wild-type average signal). Genes identified by the software as “Present” in at least one array out of a total of 4 arrays were selected for further analyses, and those with ratios  $\leq 0.5$  or  $\geq 2.0$  were considered as differentially expressed genes at a significant level. For P19 and P32 experiments, cDNA sample was similarly generated from total pancreatic RNA (10  $\mu$ g) from single animals and then, equivalent amounts of two samples of the same genotype were pooled prior to cRNA and hybridization to a single array. Genes identified as “Present” in at least one of the two arrays (mutant and wild-type) were selected for further analyses. The genes that showed an increase difference of  $\geq 2.0$  fold in the magnitude (i.e., Signal Log Ratio  $\geq 1.0$  or  $\leq -1.0$ ) were considered as differentially expressed genes at a significant level. Repeat appearance of the same gene in the tables indicates multiple detections by different Affymetrix probes for the same gene.
