# Supplementary material for: PERK eIF2 alpha kinase is required to regulate the viability of the exocrine pancreas in mice
Source: PubMed Central journal article supplement (PMC2072952; doi:10.1186/1471-2121-8-38), 2007-08-29
Supplement: 1471-2121-8-38-S2.pdf [file 1471-2121-8-38-S2.pdf]

| Gene symbol          | Gene title                                                                               | P16 | P19 | P32 |
|----------------------|------------------------------------------------------------------------------------------|-----|-----|-----|
| <i>Star</i>          | steroidogenic acute regulatory protein                                                   | -   | 0.2 | -   |
| <i>Cyp39a1</i>       | cytochrome P450, family 39, subfamily a, polypeptide 1                                   | ns  | ns  | 0.2 |
| <i>Mat1a</i>         | methionine adenosyltransferase I, alpha                                                  | ns  | ns  | 0.2 |
| <i>Alb1</i>          | albumin 1                                                                                | 0.2 | -   | -   |
| ---                  | RIKEN cDNA 6330416G13 gene                                                               | ns  | -   | 0.3 |
| <i>Hamp2</i>         | hepcidin antimicrobial peptide 2                                                         | ns  | ns  | 0.1 |
| <i>Fabp1</i>         | fatty acid binding protein 1, liver                                                      | 0.0 | -   | -   |
| <i>Upp2</i>          | uridine phosphorylase 2                                                                  | 0.2 | ns  | 0.4 |
| <i>Tdh</i>           | L-threonine dehydrogenase                                                                | ns  | 0.2 | -   |
| <i>1810008K16Rik</i> | ER resident transmembrane homologous to yeast ERP-6, emp24/gp25L/p24                     | ns  | 0.2 | 0.1 |
| ---                  | RIKEN cDNA 2310014L17 gene                                                               | ns  | 0.3 | ns  |
| ---                  | RIKEN cDNA A030012M09 gene                                                               | ns  | ns  | 0.3 |
| <i>Eif2ak3</i>       | eukaryotic translation initiation factor 2 alpha kinase 3                                | 0.4 | ns  | 0.2 |
| <i>Serpina1a</i>     | serine (or cysteine) proteinase inhibitor, clade A, member 1a                            | 0.0 | -   | -   |
| <i>Ahsg</i>          | alpha-2-HS-glycoprotein                                                                  | 0.1 | -   | -   |
| <i>Tdel</i>          | tumor differentially expressed 1                                                         | 0.2 | ns  | ns  |
| <i>Vegfb</i>         | vascular endothelial growth factor B                                                     | ns  | -   | 0.2 |
| <i>Camk2b</i>        | Calcium/calmodulin-dependent protein kinase II, beta                                     | ns  | 0.4 | 0.0 |
| <i>Myh6</i>          | myosin, heavy polypeptide 6, cardiac muscle, alpha                                       | -   | -   | 0.1 |
| <i>Vtn</i>           | vitronectin                                                                              | ns  | ns  | 0.2 |
| <i>Vtn</i>           | vitronectin                                                                              | ns  | ns  | 0.2 |
| <i>Gngt1</i>         | guanine nucleotide binding protein (G protein), gamma transducing activity polypeptide 1 | ns  | ns  | 0.3 |
| <i>Pou2f1</i>        | POU domain, class 2, transcription factor 1                                              | ns  | ns  | 0.3 |
| <i>Eomes</i>         | eomesodermin homolog ( <i>Xenopus laevis</i> )                                           | -   | -   | 0.1 |
| ---                  | RIKEN cDNA 2210418O10 gene                                                               | ns  | 0.5 | 0.2 |
| <i>BC013476</i>      | similar to cytochrome P450, 4a10                                                         | ns  | -   | 0.2 |
| ---                  | similar to ubiquinol-cytochrome c reductase complex (7.2 kD)                             | ns  | 0.1 | 0.3 |
| <i>Pnrc1</i>         | proline-rich nuclear receptor coactivator 1                                              | 0.2 | -   | ns  |
| <i>Dtl</i>           | denticleless homolog ( <i>Drosophila</i> ), 2810047L02Rik                                | 0.2 | -   | -   |

**Table S2. Summary of microarray data for genes with decreased expression levels.** Numbers are fold changes in gene expression levels in the mutant pancreata as compared to wild-type controls. Genes that showed reduced expression levels by 4 fold or higher in at least one age group are shown. “-,” expression was not detectable at a significant level; “ns,” expression was detectable but was not identified as significantly different between mutant and wild-type samples (i.e., less than 2-fold change). For P16 samples, RNA from a single pancreas was used per array, and each genotype had two biological replicates. For data analysis, signals of the replicates were averaged for each probe within a genotype for calculation

of a ratio (i.e., mutant average signal / wild-type average signal). Genes identified by the software as “Present” in at least one array out of a total of 4 arrays were selected for further analyses, and those with ratios  $\leq 0.5$  or  $\geq 2.0$  were considered as differentially expressed genes at a significant level. For P19 and P32 experiments, cDNA sample was similarly generated from total pancreatic RNA (10  $\mu\text{g}$ ) from single animals and then, equivalent amounts of two samples of the same genotype were pooled prior to cRNA and hybridization to a single array. Genes identified as “Present” in at least one of the two arrays (mutant and wild-type) were selected for further analyses. The genes that showed a decrease difference of  $\geq 2.0$  fold in the magnitude (i.e., Signal Log Ratio  $\geq 1.0$  or  $\leq -1.0$ ) were considered as differentially expressed genes at a significant level. Repeat appearance of the same gene in the tables indicates multiple detections by different Affymetrix probes for the same gene.
