# Supplementary material for: PERK eIF2 alpha kinase is required to regulate the viability of the exocrine pancreas in mice
Source: PubMed Central journal article supplement (PMC2072952; doi:10.1186/1471-2121-8-38), 2007-08-29
Supplement: 1471-2121-8-38-S3.pdf [file 1471-2121-8-38-S3.pdf]

**Table S3.** Results of microarray analyses for major ER-resident and ER stress-related genes.

Signal intensity, Present Call by Affymetrix software (P, present; A, absent, M, marginal), fold change, and indication of significance (\*) are shown.

When a gene is either "A" or "M" in both genotypes, the fold change column has no value ("-").

Significance was indicated for the genes that had detectable expression levels and showed at least 2-fold difference between mutant and wild-type samples.

(Also see Materials and Methods for details.)

| Gene Name | P16           |     |               |     | P19  |      |           |             |           | P32    |      |           |             |           | Probe Set ID |        |              |
|-----------|---------------|-----|---------------|-----|------|------|-----------|-------------|-----------|--------|------|-----------|-------------|-----------|--------------|--------|--------------|
|           | E+_ave signal | P/A | E-_ave signal | P/A | Fold | sig* | E+_Signal | E+_E_Signal | E-_ Fold  | Change | sig* | E+_Signal | E+_E_Signal | E-_ Fold  |              | Change | sig*         |
| Atf3      | 98.1 P        |     | 76.2 A        |     | 1.29 |      | 112.1 A   |             | 65.8 A    | -      | -    | 86.2 A    |             | 122.8 A   | -            | -      | 1449363_at   |
| Atf6      | 279.2 P       |     | 217.7 P       |     | 1.28 |      | 230.9 P   |             | 224.5 P   | 1.00   | NC   | 118.5 P   |             | 289.6 P   | 0.47         | D      | 1435444_at   |
| BiP       | 6039.0 P      |     | 6017.9 P      |     | 1.00 |      | 6863.9 P  |             | 4354.4 P  | 1.52   | I    | 2099.7 P  |             | 4671.6 P  | 0.62         | NC     | 1416064_a_at |
| BiP       | 3282.3 P      |     | 2897.4 P      |     | 1.13 |      | 2843.7 P  |             | 1450.4 P  | 2.00   | I    | 759.7 P   |             | 1146.9 P  | 0.57         | NC     | 1427464_s_at |
| Chop      | 111.5 P       |     | 86.2 P        |     | 1.29 |      | 63.7 A    |             | 67.2 A    | -      | -    | 121.2 P   |             | 148.4 M   | 0.81         | NC     | 1417516_at   |
| EDEM      | 832.0 A       |     | 715.4 A       |     | -    |      | 570.2 A   |             | 571.7 A   | -      | -    | 253 A     |             | 630.6 A   | -            | -      | 1451218_at   |
| EDEM      | 1607.7 P      |     | 1641.8 P      |     | 0.98 |      | 1824.2 P  |             | 1812.7 P  | 1.00   | NC   | 1060.2 P  |             | 1768.5 P  | 0.57         | NC     | 1424065_at   |
| ERdj4     | 1515.7 P      |     | 1319.5 P      |     | 1.15 |      | 1075.6 P  |             | 1254.7 P  | 0.87   | NC   | 441.5 P   |             | 744.6 P   | 0.66         | NC     | 1417191_at   |
| ERdj5     | 94.4 A        |     | 77.0 A        |     | -    |      | 97.5 A    |             | 89.4 A    | -      | -    | 79 A      |             | 85.7 A    | -            | -      | 1452230_at   |
| ERdj5     | 170.3 P       |     | 164.8 P       |     | 1.03 |      | 142.8 P   |             | 208.7 P   | 1.00   | NC   | 99.4 P    |             | 124.6 A   | 0.87         | NC     | 1426904_s_at |
| ERdj5     | 325.4 P       |     | 317.3 P       |     | 1.03 |      | 361.3 P   |             | 276.9 P   | 1.23   | NC   | 251.7 P   |             | 281.4 P   | 0.93         | NC     | 1426905_a_at |
| Ero1a     | 210.0 P       |     | 195.4 P       |     | 1.07 |      | 204.3 P   |             | 200.8 P   | 1.07   | NC   | 127.6 P   |             | 224.8 P   | 0.54         | NC     | 1419029_at   |
| Ero1a     | 127.8 P       |     | 133.8 P       |     | 0.96 |      | 152.2 P   |             | 174.2 P   | 0.81   | NC   | 58.3 P    |             | 120.1 P   | 0.54         | D      | 1419030_at   |
| Ero1a     | 401.5 P       |     | 467.6 P       |     | 0.86 |      | 432.7 P   |             | 464.4 P   | 0.93   | NC   | 252.2 P   |             | 335 P     | 0.66         | NC     | 1449324_at   |
| Ero1b     | 94.3 A        |     | 94.5 A        |     | -    |      | 130.4 A   |             | 96.7 A    | -      | -    | 82.5 M    |             | 127.6 P   | 0.62         | NC     | 1449948_at   |
| Ero1b     | 644.8 P       |     | 655.7 P       |     | 0.98 |      | 532.4 P   |             | 909 P     | 0.71   | D    | 446 P     |             | 1023.9 P  | 0.38         | D      | 1425705_a_at |
| Ero1b     | 2348.4 P      |     | 2686.5 P      |     | 0.87 |      | 2437.4 P  |             | 3058.5 P  | 0.87   | NC   | 1554.1 P  |             | 3736.7 P  | 0.44         | D      | 1434714_at   |
| ERp29     | 642.2 P       |     | 618.1 P       |     | 1.04 |      | 648.8 P   |             | 692.5 P   | 0.93   | NC   | 350.6 P   |             | 443.2 P   | 0.62         | NC     | 1453634_a_at |
| ERp44     | 202.6 P       |     | 204.6 P       |     | 0.99 |      | 122.8 P   |             | 230.8 P   | 0.71   | NC   | 136.2 A   |             | 175.8 A   | -            | -      | 1423246_at   |
| ERp44     | 618.8 P       |     | 466.5 P       |     | 1.33 |      | 441.9 P   |             | 358.2 P   | 1.07   | NC   | 326 P     |             | 339.6 P   | 0.87         | NC     | 1423247_at   |
| ERp72     | 308.6 P       |     | 235.6 P       |     | 1.31 |      | 173.7 P   |             | 71.5 A    | 1.74   | I    | 142.9 P   |             | 146.4 M   | 1.00         | I      | 1416497_at   |
| Grp58     | 2085.2 P      |     | 1853.4 P      |     | 1.13 |      | 1312.6 P  |             | 664.6 P   | 2.14   | I    | 508.8 P   |             | 944.7 P   | 0.76         | NC     | 1423423_at   |
| Grp94     | 1967.1 P      |     | 2091.2 P      |     | 0.94 |      | 2063.3 P  |             | 1477.3 P  | 1.52   | I    | 702.9 P   |             | 1126.4 P  | 0.66         | NC     | 1415889_a_at |
| Grp94     | 1381.1 P      |     | 1428.0 P      |     | 0.97 |      | 1153.3 P  |             | 908.5 P   | 1.41   | I    | 268.1 P   |             | 532.9 P   | 0.57         | NC     | 1438040_a_at |
| HEDJ      | 1254.3 P      |     | 1170.6 P      |     | 1.07 |      | 749.9 P   |             | 731.3 P   | 1.15   | NC   | 372 P     |             | 636.7 P   | 0.62         | NC     | 1423151_at   |
| Herp      | 4606.8 P      |     | 4347.8 P      |     | 1.06 |      | 2894.4 P  |             | 3493.6 P  | 0.93   | NC   | 2013.7 P  |             | 4892.8 P  | 0.47         | MD     | 1435626_a_at |
| Herp      | 3315.6 P      |     | 3724.5 P      |     | 0.89 |      | 2221.8 P  |             | 2356.9 P  | 0.93   | NC   | 1310.7 P  |             | 3102.3 P  | 0.47         | NC     | 1448185_at   |
| Ire1a     | 17.3 A        |     | 38.8 A        |     | -    |      | 53.8 A    |             | 19.9 A    | -      | -    | 9.8 A     |             | 23.1 A    | -            | -      | 1421240_at   |
| Ire1a     | 3.0 A         |     | 3.5 A         |     | -    |      | 4.1 A     |             | 3.8 A     | -      | -    | 1.6 A     |             | 8 A       | -            | -      | 1431886_at   |
| Ire1a     | 29.8 A        |     | 57.2 P        |     | 0.52 |      | 63.8 A    |             | 23.3 A    | -      | -    | 39.1 P    |             | 42.7 A    | 0.66         | NC     | 1450176_at   |
| Ire1b     | 4.1 A         |     | 6.9 A         |     | -    |      | 8.7 A     |             | 41.4 A    | -      | -    | 5.8 A     |             | 4.3 A     | -            | -      | 1450139_at   |
| p58IPK    | 987.9 P       |     | 911.0 P       |     | 1.08 |      | 1156 P    |             | 736.7 A   | 1.23   | I    | 279.7 A   |             | 472 A     | -            | -      | 1419163_s_at |
| p58IPK    | 458.8 P       |     | 465.3 P       |     | 0.99 |      | 397.8 P   |             | 243.4 P   | 1.52   | I    | 193.1 P   |             | 323.1 P   | 0.62         | NC     | 1419162_s_at |
| p58IPK    | 1510.5 P      |     | 1221.5 P      |     | 1.24 |      | 1163.9 P  |             | 949.5 P   | 1.23   | I    | 423.9 P   |             | 885.3 P   | 0.57         | NC     | 1433887_at   |
| p58IPK    | 1478.2 P      |     | 1242.7 P      |     | 1.19 |      | 1200.5 P  |             | 1062.9 P  | 1.15   | NC   | 805.6 P   |             | 1216 P    | 0.62         | NC     | 1449372_at   |
| p58IPK    | 151.7 P       |     | 219.0 P       |     | 0.69 |      | 133.9 P   |             | 97.3 P    | 1.15   | NC   | 40 P      |             | 85.9 P    | 0.54         | NC     | 1449373_at   |
| PDI       | 8537.1 P      |     | 9189.5 P      |     | 0.93 |      | 8808.6 P  |             | 10389.2 P | 0.93   | NC   | 5974.2 P  |             | 11407.6 P | 0.54         | NC     | 1437465_a_at |
| PDI-P5    | 68.7 P        |     | 63.2 A        |     | 1.09 |      | 70.8 A    |             | 77 A      | -      | -    | 39.1 A    |             | 75.4 A    | -            | -      | 1430983_at   |
| PDI-P5    | 2440.1 P      |     | 2325.4 P      |     | 1.05 |      | 2033 P    |             | 1837.1 P  | 1.15   | NC   | 1103.5 P  |             | 1204.1 P  | 0.87         | NC     | 1423648_at   |
| Ramp4     | 2438.6 P      |     | 2312.9 P      |     | 1.05 |      | 2439.5 P  |             | 2657 P    | 0.93   | NC   | 1208.8 P  |             | 2237.4 P  | 0.50         | NC     | 1415827_a_at |
| Ramp4     | 3546.2 P      |     | 3484.8 P      |     | 1.02 |      | 2828.3 P  |             | 3834 P    | 0.76   | NC   | 1880.1 P  |             | 4077.8 P  | 0.47         | NC     | 1415828_a_at |
| Sec61a1   | 1380.3 P      |     | 1243.1 P      |     | 1.11 |      | 1158.7 P  |             | 1242.4 P  | 1.07   | NC   | 862.6 P   |             | 1383.4 P  | 0.62         | NC     | 1416189_a_at |
| Sec61a1   | 625.0 P       |     | 599.0 P       |     | 1.04 |      | 418.3 P   |             | 546.1 P   | 0.71   | D    | 250.5 P   |             | 539.9 P   | 0.47         | D      | 1416190_a_at |
| Sec61a1   | 2146.2 P      |     | 2202.3 P      |     | 0.97 |      | 1373.2 P  |             | 1726.1 P  | 0.81   | NC   | 701.7 P   |             | 1597.8 P  | 0.47         | D      | 1416191_at   |
| Sec61a1   | 1142.8 P      |     | 1035.5 P      |     | 1.10 |      | 784.4 P   |             | 784.9 P   | 0.93   | NC   | 533.6 P   |             | 1090.2 P  | 0.47         | NC     | 1434986_a_at |
| Sec61a1   | 1668.7 P      |     | 1447.0 P      |     | 1.15 |      | 1373.1 P  |             | 1385.9 P  | 1.07   | NC   | 714.5 P   |             | 1067.6 P  | 0.66         | NC     | 1448242_at   |
| Sec61a1   | 334.2 P       |     | 357.5 P       |     | 0.93 |      | 397.6 P   |             | 413 P     | 1.00   | NC   | 164.6 P   |             | 243.1 P   | 0.62         | NC     | 1455987_at   |

|         |          |          |      |          |          |      |    |          |          |      |    |              |
|---------|----------|----------|------|----------|----------|------|----|----------|----------|------|----|--------------|
| Sec61a2 | 52.6 A   | 61.2 A   | -    | 69.5 A   | 56.3 A   | -    | -  | 35.3 A   | 72.7 A   | -    | -  | 1449944_a_at |
| Sec61a2 | 47.3 P   | 58.0 A   | 0.82 | 45.5 A   | 66.4 A   | -    | -  | 35.1 M   | 69 A     | -    | -  | 1420644_a_at |
| Sil1    | 405.8 P  | 395.2 P  | 1.03 | 509.3 P  | 426.6 P  | 1.00 | NC | 309.1 P  | 455.2 P  | 0.62 | NC | 1417354_at   |
| Xbp1    | 138.8 P  | 197.3 P  | 0.70 | 232 P    | 208.9 A  | 1.32 | NC | 163.9 P  | 208.3 P  | 0.81 | NC | 1420012_at   |
| Xbp1    | 1052.6 P | 974.5 P  | 1.08 | 1258.7 P | 1016.2 P | 1.23 | I  | 976.4 P  | 1456 P   | 0.66 | NC | 1420011_s_at |
| Xbp1    | 4338.9 P | 3879.3 P | 1.12 | 5533.9 P | 4178.6 P | 1.32 | I  | 4827.4 P | 7590.7 P | 0.62 | NC | 1420886_a_at |
| Xbp1    | 3617.4 P | 3471.0 P | 1.04 | 4928.5 P | 3638.8 P | 1.32 | I  | 4141.7 P | 5769.2 P | 0.71 | NC | 1437223_s_at |
