# Supplementary material for: PERK eIF2 alpha kinase is required to regulate the viability of the exocrine pancreas in mice
Source: PubMed Central journal article supplement (PMC2072952; doi:10.1186/1471-2121-8-38), 2007-08-29
Supplement: 1471-2121-8-38-S4.pdf [file 1471-2121-8-38-S4.pdf]

**Table S4.** Results of microarray analyses for major apoptosis-related genes.

Signal intensity, Present Call by Affymetrix software (P, present; A, absent, M, marginal), fold change, and indication of significance (\*) are shown.

When a gene is either "A" or "M" in both genotypes, the fold change column has no value ("-").

Significance was indicated for the genes that had detectable expression levels and showed at least 2-fold difference between mutant and wild-type samples.

(Also see Materials and Methods for details.)

| Gene Symbol (   | P16           |     |               |     |           | P19       |              |         |        |      | P32       |              |         |        |      | Probe Set ID |
|-----------------|---------------|-----|---------------|-----|-----------|-----------|--------------|---------|--------|------|-----------|--------------|---------|--------|------|--------------|
|                 | E+_ave signal | P/A | E-_ave signal | P/A | Fold sig* | E+_Signal | E+_E-_Signal | E-_Fold | Change | sig* | E+_Signal | E+_E-_Signal | E-_Fold | Change | sig* |              |
| Apaf1           | 45.1          | A   | 48.0          | A   | -         | 42.8      | A            | 17.4    | A      | -    | 21.6      | A            | 23.8    | A      | -    | 1450223_at   |
| Apaf1           | 76.4          | P   | 85.0          | P   | 0.90      | 70.2      | P            | 87.9    | P      | 0.66 | 63        | P            | 58.1    | P      | 0.81 | 1452870_at   |
| Bad             | 141.6         | A   | 77.4          | A   | -         | 61.1      | A            | 104.7   | A      | -    | 48.6      | A            | 37.7    | A      | -    | 1416582_a_at |
| Bad             | 90.9          | A   | 69.8          | A   | -         | 54.7      | A            | 58.3    | A      | -    | 94        | A            | 114.4   | A      | -    | 1416583_at   |
| Bak1            | 23.8          | A   | 28.1          | A   | -         | 11        | A            | 10.6    | A      | -    | 22.2      | A            | 10.4    | A      | -    | 1425716_s_at |
| Bak1            | 47.1          | P   | 36.7          | A   | 1.29      | 39.8      | A            | 17.2    | A      | -    | 28        | A            | 5.8     | A      | -    | 1418991_at   |
| Bax             | 172.2         | P   | 172.2         | P   | 1.00      | 124.1     | P            | 155.8   | P      | 1.00 | 145.5     | P            | 194.3   | P      | 0.76 | 1416837_at   |
| Bcl2            | 107.7         | A   | 130.3         | A   | -         | 195.4     | A            | 169.3   | A      | -    | 87        | A            | 193     | A      | -    | 1422938_at   |
| Bcl2            | 24.7          | A   | 47.4          | A   | -         | 65.8      | A            | 40.2    | A      | -    | 40.1      | A            | 64.8    | A      | -    | 1427818_at   |
| Bcl2            | 39.6          | A   | 41.6          | A   | -         | 45.7      | A            | 24.5    | A      | -    | 28.9      | A            | 29.8    | A      | -    | 1427819_at   |
| Bcl2a1a /// Bcl | 6.8           | A   | 20.6          | A   | -         | 25.6      | A            | 29.5    | A      | -    | 11.4      | A            | 2.5     | A      | -    | 1450812_at   |
| Bcl2a1a /// Bcl | 52.9          | A   | 39.8          | A   | -         | 93.4      | A            | 67.5    | A      | -    | 72.5      | A            | 73.2    | A      | -    | 1419004_s_at |
| Bcl2a1a /// Bcl | 18.3          | A   | 16.6          | A   | -         | 6.5       | A            | 17.3    | A      | -    | 2.7       | A            | 24.3    | A      | -    | 1437913_at   |
| Bcl2l1          | 94.6          | A   | 92.9          | A   | -         | 77.1      | A            | 121.9   | A      | -    | 72.3      | A            | 43.9    | A      | -    | 1420887_a_at |
| Bcl2l1          | 28.0          | A   | 23.6          | A   | -         | 29.4      | A            | 62.1    | A      | -    | 22.6      | A            | 37.5    | A      | -    | 1426050_at   |
| Bcl2l1          | 2.8           | A   | 4.9           | A   | -         | 3.6       | A            | 2.3     | A      | -    | 2.5       | A            | 3.5     | A      | -    | 1426191_a_at |
| Bcl2l1          | 276.9         | P   | 274.0         | P   | 1.01      | 299.8     | P            | 343.1   | P      | 0.93 | 211.9     | P            | 331.9   | P      | 0.66 | 1420888_at   |
| Bcl2l11         | 40.6          | A   | 56.3          | A   | -         | 58.6      | A            | 52.9    | A      | -    | 44.5      | A            | 50.1    | A      | -    | 1426334_a_at |
| Bcl2l11         | 35.0          | A   | 41.1          | A   | -         | 32.5      | A            | 69.6    | A      | -    | 18.8      | A            | 59.4    | A      | -    | 1435449_at   |
| Bcl2l11         | 61.1          | A   | 78.2          | A   | -         | 46.2      | A            | 93.5    | A      | -    | 21.6      | A            | 41      | A      | -    | 1456006_at   |
| Bcl2l11         | 159.1         | P   | 178.5         | M   | 0.89      | 123.3     | M            | 122     | A      | -    | 83.1      | P            | 122.1   | A      | 0.57 | 1456005_a_at |
| Bcl2l11         | 139.7         | P   | 147.0         | P   | 0.95      | 207.3     | P            | 195     | P      | 1.00 | 114.6     | P            | 155.8   | P      | 0.62 | 1435448_at   |
| Bcl2l2          | 66.4          | A   | 78.3          | A   | -         | 64.8      | A            | 91.6    | A      | -    | 47        | A            | 80.1    | A      | -    | 1430453_a_at |
| Bcl2l2          | 45.6          | A   | 51.4          | A   | -         | 53.4      | A            | 16.7    | A      | -    | 29.2      | A            | 19.6    | A      | -    | 1430454_x_at |
| Bcl2l2          | 51.0          | A   | 52.1          | A   | -         | 47.5      | A            | 54.4    | A      | -    | 27.3      | A            | 61.1    | A      | -    | 1451029_at   |
| Bcl2l2          | 373.4         | P   | 402.1         | P   | 0.93      | 336.7     | P            | 353.3   | P      | 0.93 | 233.5     | P            | 415     | P      | 0.62 | 1423572_at   |
| Bid             | 9.6           | A   | 3.4           | A   | -         | 5.2       | A            | 2.6     | A      | -    | 2.3       | A            | 3.6     | A      | -    | 1417045_at   |
| Bid             | 6.0           | A   | 6.0           | A   | -         | 22.9      | A            | 3.2     | A      | -    | 7.4       | A            | 14.8    | A      | -    | 1448560_at   |
| Birc2           | 174.3         | P   | 165.0         | P   | 1.06      | 180.9     | P            | 145.1   | P      | 1.41 | 108.5     | P            | 95.1    | P      | 0.81 | 1418854_at   |
| Birc3           | 3.0           | A   | 8.9           | A   | -         | 7.2       | A            | 6.7     | A      | -    | 3.4       | A            | 6       | A      | -    | 1425223_at   |
| Birc3           | 183.1         | P   | 138.6         | A   | 1.32      | 237.8     | P            | 116.8   | A      | 1.52 | 124.2     | A            | 127.1   | A      | -    | 1421392_a_at |
| Birc4           | 8.5           | A   | 8.9           | A   | -         | 17.6      | A            | 24.3    | A      | -    | 9.9       | A            | 9.7     | A      | -    | 1426636_a_at |
| Birc4           | 9.3           | A   | 17.4          | A   | -         | 7.1       | A            | 12.1    | A      | -    | 3.7       | A            | 18.4    | A      | -    | 1450231_a_at |
| Birc4           | 33.0          | A   | 10.6          | A   | -         | 18.9      | A            | 19.1    | A      | -    | 25.2      | A            | 25.6    | A      | -    | 1450232_at   |
| Birc4           | 36.2          | P   | 36.7          | P   | 0.99      | 53.3      | P            | 57.9    | P      | 0.81 | 15.2      | P            | 3.8     | A      | 2.64 | 1456088_at   |
| Birc4           | 211.7         | P   | 238.1         | P   | 0.89      | 261.2     | P            | 238     | P      | 1.15 | 136.3     | P            | 168     | P      | 0.81 | 1437533_at   |
| Birc4 /// LOC38 | 9.1           | A   | 9.1           | A   | -         | 13.1      | A            | 16.7    | A      | -    | 6.6       | A            | 1.3     | A      | -    | 1421394_a_at |
| Birc5           | 273.9         | P   | 285.8         | P   | 0.96      | 196       | A            | 245.7   | A      | -    | 69.1      | A            | 14.2    | A      | -    | 1424278_a_at |
| Bnip3l          | 478.1         | P   | 402.9         | P   | 1.19      | 507.8     | P            | 411.5   | P      | 1.07 | 412.4     | P            | 479.8   | P      | 1.00 | 1416922_a_at |
| Bnip3l          | 266.7         | P   | 180.5         | P   | 1.48      | 295.9     | P            | 297.6   | P      | 1.15 | 259.9     | P            | 311.8   | P      | 0.87 | 1416923_a_at |
| Bnip3l          | 118.9         | P   | 112.2         | P   | 1.06      | 115.4     | P            | 120.8   | P      | 0.93 | 137.9     | P            | 143.9   | P      | 0.87 | 1448525_a_at |
| Bok             | 541.3         | P   | 457.6         | P   | 1.18      | 310.6     | P            | 557.7   | P      | 0.62 | 161.7     | P            | 397.2   | P      | 0.50 | 1417040_a_at |
| Casp1           | 16.5          | A   | 7.1           | A   | -         | 40.8      | M            | 43.1    | A      | -    | 19.8      | M            | 32.4    | A      | -    | 1449265_at   |
| Casp11          | 41.1          | A   | 21.4          | A   | -         | 60.8      | A            | 6.7     | A      | -    | 27.9      | A            | 12.5    | A      | -    | 1449591_at   |
| Casp12          | 104.4         | P   | 73.1          | P   | 1.43      | 135.6     | P            | 96.7    | A      | 1.41 | 117.8     | P            | 89.1    | P      | 1.00 | 1418981_at   |

|         |          |          |      |          |          |         |         |          |         |                |
|---------|----------|----------|------|----------|----------|---------|---------|----------|---------|----------------|
| Casp12  | 58.5 P   | 52.9 P   | 1.11 | 99.4 P   | 48.7 P   | 1.52 NC | 32.2 P  | 63.4 P   | 0.57 NC | 1449297_at     |
| Casp2   | 158.6 P  | 181.0 P  | 0.88 | 168.5 P  | 148.2 P  | 0.93 NC | 96.8 P  | 115.9 P  | 0.66 NC | 1448165_at     |
| Casp3   | 38.2 A   | 51.2 A   | -    | 35.4 A   | 60.4 A   | -       | 38.5 A  | 45.9 A   | -       | 1426165_a_at   |
| Casp3   | 114.2 A  | 66.0 A   | -    | 159.3 A  | 144.5 A  | -       | 80.5 A  | 141.8 A  | -       | 1449839_at     |
| Casp6   | 111.3 P  | 102.4 A  | 1.09 | 129.5 A  | 161.6 M  | -       | 58.3 P  | 142.4 M  | 0.57 NC | 1415995_at     |
| Casp7   | 56.9 A   | 71.7 A   | -    | 33.9 A   | 50.9 A   | -       | 41.5 A  | 47.5 A   | -       | 1426062_a_at   |
| Casp7   | 10.9 A   | 16.8 A   | -    | 11.7 A   | 17.1 A   | -       | 9.2 A   | 17.6 A   | -       | 1434099_at     |
| Casp7   | 4.0 A    | 3.7 A    | -    | 3.4 A    | 54.4 A   | -       | 12.8 A  | 16.9 A   | -       | 1434100_x_at   |
| Casp7   | 62.5 P   | 87.5 P   | 0.71 | 96.2 P   | 94.4 A   | 0.87 NC | 60.7 A  | 74.7 A   | -       | 1448659_at     |
| Casp8   | 162.8 P  | 148.8 P  | 1.09 | 217.1 P  | 162.7 P  | 1.23 I  | 135 P   | 182.2 P  | 0.81 NC | 1424552_at     |
| Casp9   | 16.5 A   | 28.2 A   | -    | 47.1 A   | 52.6 A   | -       | 52.9 A  | 10.2 A   | -       | 1426125_a_at   |
| Casp9   | 61.9 P   | 39.0 P   | 1.59 | 27.9 A   | 40.4 A   | -       | 35.3 A  | 65.5 A   | -       | 1437537_at     |
| Cflar   | 56.5 A   | 40.4 A   | -    | 29.7 A   | 32 A     | -       | 65.3 A  | 35.8 A   | -       | 1449317_at     |
| Cflar   | 58.8 P   | 50.5 A   | 1.16 | 58.6 A   | 46 A     | -       | 12.6 A  | 58.8 A   | -       | 1425686_at     |
| Cflar   | 28.3 A   | 35.1 P   | 0.81 | 29.3 A   | 27.7 P   | 0.81 NC | 9.9 A   | 18.4 A   | -       | 1425687_at     |
| Cflar   | 154.6 P  | 145.3 P  | 1.06 | 169.4 P  | 160.5 P  | 1.07 NC | 117.2 P | 155.8 P  | 0.71 NC | 1424996_at     |
| Cradd   | 70.4 A   | 79.1 P   | 0.89 | 79.3 P   | 105.9 A  | 0.87 NC | 57.1 P  | 221.3 P  | 0.54 NC | 1427505_a_at   |
| Cycs    | 745.3 P  | 726.5 P  | 1.03 | 630.8 P  | 816.4 P  | 0.81 NC | 322.2 P | 428.5 P  | 0.81 I  | 1422483_a_at   |
| Cycs    | 338.6 P  | 284.5 P  | 1.19 | 264.1 P  | 316.4 P  | 0.93 NC | 181.2 P | 276.7 P  | 0.71 NC | 1422484_at     |
| Cycs    | 1860.2 P | 1490.5 P | 1.25 | 1390.4 P | 1674.9 P | 0.81 NC | 718.7 P | 1017.7 P | 0.71 NC | 1456071_a_at   |
| Cyct    | 17.8 P   | 25.6 P   | 0.69 | 26.5 A   | 25 A     | -       | 15.8 P  | 37.3 P   | 0.29 NC | 1450752_at     |
| Daxx    | 310.0 P  | 307.7 P  | 1.01 | 289.1 P  | 263.2 P  | 1.15 NC | 176.6 P | 411.9 P  | 0.47 NC | 1419026_at     |
| Dffa    | 97.1 P   | 145.5 P  | 0.67 | 117.4 M  | 115.4 P  | 1.32 NC | 69.9 M  | 128.3 P  | 0.57 NC | 1450885_at     |
| Dffb    | 42.4 A   | 48.4 A   | -    | 48.3 A   | 44.9 A   | -       | 38 A    | 54.9 A   | -       | 1421229_at     |
| Dffb    | 20.9 P   | 22.1 A   | 0.94 | 19.7 P   | 10.9 A   | 1.62 NC | 9.3 A   | 14.2 A   | -       | 1437051_at     |
| Fadd    | 163.0 P  | 206.1 P  | 0.79 | 196.5 P  | 186.6 P  | 1.07 NC | 117.5 P | 208.1 P  | 0.66 NC | 1416888_at     |
| Fas     | 4.6 A    | 4.0 A    | -    | 9.2 A    | 4.2 A    | -       | 2.2 A   | 3.9 A    | -       | 1460251_at     |
| Fasl    | 23.2 A   | 28.7 A   | -    | 41.4 A   | 47.2 A   | -       | 10.5 A  | 11.7 A   | -       | 1418803_a_at   |
| Fasl    | 26.1 A   | 45.6 A   | -    | 49.4 A   | 45.7 A   | -       | 25.3 A  | 38.8 A   | -       | 1449235_at     |
| Hrk     | 112.6 P  | 157.5 P  | 0.71 | 182.8 P  | 139.1 M  | 1.15 NC | 94.7 A  | 185.1 P  | 0.54 NC | 1450366_at     |
| Mcl1    | 606.5 P  | 549.9 P  | 1.10 | 603.7 P  | 627.5 P  | 0.93 NC | 277.9 P | 576 P    | 0.44 D  | * 1416880_at   |
| Mcl1    | 359.2 P  | 251.3 P  | 1.43 | 306.6 P  | 218.2 P  | 1.15 NC | 264 P   | 340 P    | 0.50 NC | 1416881_at     |
| Mcl1    | 838.9 P  | 720.3 P  | 1.16 | 907.3 P  | 913.8 P  | 1.00 NC | 434.3 P | 693.7 P  | 0.50 NC | 1437527_x_at   |
| Mcl1    | 614.8 P  | 522.7 P  | 1.18 | 537.4 P  | 531.6 P  | 1.00 NC | 328.4 P | 552.7 P  | 0.62 NC | 1448503_at     |
| Mcl1    | 681.2 P  | 544.9 P  | 1.25 | 749.9 P  | 686.8 P  | 1.07 NC | 281.9 P | 683.7 P  | 0.38 D  | * 1456243_x_at |
| Mcl1    | 268.7 P  | 246.0 P  | 1.09 | 358.8 P  | 371.6 P  | 1.00 NC | 142.9 P | 319.4 P  | 0.47 D  | * 1456381_x_at |
| Parp1   | 359.2 P  | 336.6 P  | 1.07 | 182.6 A  | 280.4 A  | -       | 134.8 A | 173.6 A  | -       | 1422502_at     |
| Parp1   | 274.3 P  | 206.8 P  | 1.33 | 300.4 P  | 246.8 P  | 0.87 NC | 104.3 A | 146.6 M  | -       | 1422503_s_at   |
| Parp1   | 138.1 P  | 136.2 P  | 1.01 | 96.7 P   | 160.2 P  | 0.81 NC | 62 P    | 92.9 P   | 0.54 NC | 1435368_a_at   |
| Pdcd1   | 7.2 A    | 8.1 A    | -    | 9.2 A    | 10.7 A   | -       | 8.1 A   | 7.3 A    | -       | 1449835_at     |
| Pdcd10  | 52.5 A   | 31.8 A   | -    | 52.8 A   | 41.6 A   | -       | 44.2 A  | 25 A     | -       | 1448528_at     |
| Pdcd10  | 220.6 P  | 204.2 P  | 1.08 | 147.6 P  | 153.9 P  | 1.23 NC | 116.9 P | 158 P    | 0.76 NC | 1448527_at     |
| Pdcd2   | 111.6 P  | 105.1 P  | 1.06 | 102.2 P  | 117.1 P  | 0.76 NC | 81.1 P  | 96.4 P   | 0.81 NC | 1423534_at     |
| Pdcd5   | 338.8 P  | 297.9 P  | 1.14 | 257.7 M  | 314.6 P  | 0.93 NC | 222.9 P | 293 A    | 0.76 NC | 1450638_at     |
| Pdcd6   | 398.2 P  | 351.2 P  | 1.13 | 295.2 P  | 339.7 P  | 1.00 NC | 338.5 P | 410.6 P  | 0.76 NC | 1416027_at     |
| Pdcd6ip | 45.1 A   | 32.6 A   | -    | 38.8 A   | 38 A     | -       | 26.9 P  | 63 A     | 0.57 NC | 1460263_at     |
| Pdcd6ip | 179.9 P  | 203.7 P  | 0.88 | 228 P    | 173 M    | 1.00 NC | 114.7 P | 169.4 P  | 0.57 NC | 1449674_s_at   |
| Pdcd6ip | 78.9 P   | 63.5 P   | 1.24 | 78.7 P   | 102.7 P  | 1.07 NC | 24.5 P  | 68.3 P   | 0.44 NC | 1415937_s_at   |
| Pdcd6ip | 96.6 P   | 104.9 P  | 0.92 | 104.6 P  | 141.4 P  | 0.81 NC | 32.1 P  | 103.8 P  | 0.54 NC | 1426184_a_at   |
| Pdcd6ip | 172.9 P  | 208.1 P  | 0.83 | 155.1 P  | 226.5 P  | 1.15 NC | 140.3 P | 178.2 P  | 0.66 NC | 1448155_at     |
| Pdcd7   | 47.5 A   | 37.5 A   | -    | 47 A     | 54.1 A   | -       | 42.4 A  | 66.3 A   | -       | 1416377_at     |
| Pdcd8   | 168.7 P  | 182.3 P  | 0.93 | 86.8 P   | 122.4 P  | 0.76 NC | 96.1 P  | 180.9 P  | 0.62 NC | 1418127_a_at   |
| Perp    | 320.2 P  | 262.2 P  | 1.22 | 362 P    | 270.9 P  | 0.81 NC | 281.3 P | 384.3 P  | 0.81 I  | 1416271_at     |
| Pycard  | 16.9 A   | 16.3 A   | -    | 27.3 A   | 34.6 A   | -       | 18.7 P  | 13.6 A   | 0.93 NC | 1417347_at     |

|        |         |         |      |         |         |         |         |         |         |            |
|--------|---------|---------|------|---------|---------|---------|---------|---------|---------|------------|
| Pycard | 197.2 P | 119.1 P | 1.66 | 198.8 P | 222.1 P | 0.87 NC | 230.7 P | 243 P   | 1.00 NC | 1417346_at |
| Traf1  | 4.0 A   | 4.3 A   | -    | 3.3 A   | 15.6 A  | - -     | 1.4 A   | 24.3 A  | - -     | 1423602_at |
| Traf2  | 61.6 A  | 86.8 A  | -    | 74.4 A  | 89.8 A  | - -     | 45.1 A  | 53.7 A  | - -     | 1451233_at |
| Traf3  | 12.4 A  | 28.4 A  | -    | 15.6 A  | 46 A    | - -     | 24.9 A  | 32.8 A  | - -     | 1449149_at |
| Traf3  | 131.8 P | 156.3 P | 0.84 | 172.2 P | 179.7 P | 1.00 NC | 93.8 P  | 113.7 P | 0.81 NC | 1418587_at |
